# Supplementary material for: ADAMDEC1 Maintains a Growth Factor Signaling Loop in Cancer Stem Cells
Source: Oxford University Press journal article supplement (doi:10.1158/2159-8290.cd-18-1308), 2019-08-21
Supplement: 21598290cd181308-sup-211946_2_supp_5691142_pvrbb9.docx [file 21598290cd181308-sup-211946_2_supp_5691142_pvrbb9.docx]

**Table S1**

List of antibodies and vendor information

| **Primary antibodies** | | | | |
| --- | --- | --- | --- | --- |
| **Antigen** | **Host** | **Clonality** | **Dilution** | **Supplier** |
| ZEB1 | rabbit | polyclonal | 1:2500 | Sigma |
| SOX2 | rabbit | monoclonal | 1:1000 | Cell Signaling |
| OLIG2 | rabbit | polyclonal | 1:500 | EMD Millipore |
| ADAMDEC1 | rabbit | polyclonal | 1:500 | LSBio |
| ADAMDEC1 (6C4) | mouse | monoclonal | 1:500 | Novus Biologicals |
| FGFR1 (D8E4) | rabbit | monoclonal | 1:1000 | Cell Signaling |
| FGFR1 | mouse | monoclonal | 1:50 | Invitrogen |
| FGFR2 (D4L2V) | rabbit | monoclonal | 1:1000 | Cell Signaling |
| FGFR3 IgG1 APC-conjugated | mouse | monoclonal | 1:50 | R&D Systems |
| FGFR3 (C51F2) | rabbit | monoclonal | 1:500 | Cell Signaling |
| FGFR4 | rabbit | Polyclonal | 1:500 | Sigma |
| GAPDH | rabbit | polyclonal | 1:10000 | EnCor |
| IBA1 | rabbit | polyclonal | 1:500 | Wako |
| ACTIN (I-19) | rabbit | polyclonal | 1:2000 | Santa Cruz |
| SOX2 | mouse | monoclonal | 1:1000 | Millipore |
| GFAP (2.2B10) | rat | monoclonal | 1:1000 | Invitrogen |
| p-FGFR | rabbit | polyclonal | 1:1000 | Cell Signaling |
| ERK1/2 | rabbit | polyclonal | 1:1000 | Cell Signaling |
| p-ERK1/2 | rabbit | monoclonal | 1:2000 | Cell Signaling |
| p38 | mouse | monoclonal | 1:1000 | Cell Signaling |
| p-p38 | rabbit | polyclonal | 1:1000 | Cell Signaling |
| STAT3 | rabbit | monoclonal | 1:500 | Cell Signaling |
| p-STAT3 | rabbit | polyclonal | 1:500 | Cell Signaling |
| p-AKT | rabbit | polyclonal | 1:500 | Cell Signaling |
| **Secondary antibodies** | | | | |
| **Antigen** | **Host** | **Fluorochrome** | **Dilution** | **Supplier** |
| anti-rabbit | goat | HRP-linked | 1:500 | Cell Signaling |
| anti-mouse | donkey | Alexa 647 | 1:500 | Life Technologies |
| anti-rabbit | donkey | Alexa 647 | 1:500 | Invitrogen |
| IgG1 Isotype control | mouse | APC | 1:50 | BD Bioscience |
